# Supplementary material
Source: PubMed Central journal article supplement (PMC5569908)
Supplement: NIHMS872692-supplement-supplemental_materials.pdf [file NIHMS872692-supplement-supplemental_materials.pdf]

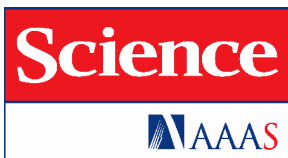

[www.sciencemag.org/content/355/6330/1129/suppl/DC1](http://www.sciencemag.org/content/355/6330/1129/suppl/DC1)

## Supplementary Material for **Developing an HIV vaccine**

Barton F. Haynes and Dennis R. Burton

Email: [barton.haynes@duke.edu](mailto:barton.haynes@duke.edu); [burton@scripps.edu](mailto:burton@scripps.edu)

Published 17 March 2017, *Science* **355**, 1129 (2017)  
DOI: [10.1126/science.aan0662](https://doi.org/10.1126/science.aan0662)

**This PDF file includes:**

Additional References

## Additional References

1. [www.unaids.org/en/resources/fact-sheet](http://www.unaids.org/en/resources/fact-sheet)
2. B. F. Haynes, J. R. Mascola, *Immunol. Rev.* **275**, 5 (2017).
3. S. Rerks-Ngarm *et al.*, *N. Engl. J. Med.* **361**, 2209 (2009).
4. B. F. Haynes *et al.*, *N. Engl. J. Med.* **366**, 1275 (2012).
5. A. J. Hessell *et al.*, *Nature* **449**, 101 (2007).
6. A. J. McMichael, P. Borrow, G. D. Tomaras, N. Goonetilleke, B. F. Haynes, *Nat. Rev. Immunol.* **10**, 11 (2010).
7. B. Ondondo *et al.*, *J. Am. Soc. Gene Ther.* **24**, 832 (2016).
8. D. H. Barouch *et al.*, *Cell* **155**, 531 (2013).
9. J. P. Julien *et al.*, *Science* **342**, 1477 (2013).
10. D. Lyumkis *et al.*, *Science* **342**, 1484 (2013).
11. M. Pancera *et al.*, *Nature* **514**, 455 (2014).
12. R. W. Sanders *et al.*, *PLOS Pathog.* **9**, e1003618 (2013).
13. N. A. Doria-Rose *et al.*, *Nature* **509**, 55 (2014).
14. H. X. Liao *et al.*, *Nature* **496**, 469 (2013).
15. M. Bonsignori *et al.*, *Cell* **165**, 449 (2016).
16. D. T. MacLeod *et al.*, *Immunity* **44**, 1215 (2016).
17. B. F. Keele *et al.*, *Proc. Natl. Acad. Sci. U.S.A.* **105**, 7552 (2008).
18. J. H. Lee, G. Ozorowski, A. B. Ward, *Science* **351**, 1043 (2016).
19. R. W. Sanders *et al.*, *Science* **349**, aac4223 (2015).
20. F. Klein *et al.*, *Cell* **153**, 126 (2013).
21. L. Stamatatos, M. Pancera, A. T. McGuire, *Immunol. Rev.* **275**, 203 (2017).
22. X. Xiao *et al.*, *Biochem. Biophys. Res. Commun.* **390**, 404 (2009).
23. B. Briney *et al.*, *Cell* **166**, 1459 (2016).
24. R. Zhang *et al.*, *Sci. Transl. Med.* **8**, 336ra362 (2016).
25. M. Tian *et al.*, *Cell* **166**, 1471 (2016).
26. P. Dosenovic *et al.*, *Cell* **161**, 1505 (2015).
27. D. R. Burton, *Cold Spring Harb. Perspect. Biol.* 10.1101/cshperspect.a030262 (2017).
28. J. G. Jardine *et al.*, *Science* **349**, 156 (2015).
29. J. M. Steichen *et al.*, *Immunity* **45**, 483 (2016).
30. D. H. Barouch *et al.*, *Nature* **503**, 224 (2013).

31. F. Klein *et al.*, *Nature* **492**, 118 (2012).
32. P. L. Moore, C. Williamson, L. Morris, *Trends Microbiol.* **23**, 204 (2015).
33. J. M. Brady, D. Baltimore, A. B. Balazs, *Immunol. Rev.* **275**, 324 (2017).
34. G. B. Karlsson Hedestam, J. Guenaga, M. Corcoran, R. T. Wyatt, *Immunol. Rev.* **275**, 183 (2017).
35. A. Pegu, A. J. Hessel, J. R. Mascola, N. L. Haigwood, *Immunol. Rev.* **275**, 296 (2017).
36. S. Bournazos, J. V. Ravetch, *Immunol. Rev.* **275**, 285 (2017).
37. B. Korber, P. Hraber, K. Wagh, B. H. Hahn, *Immunol. Rev.* **275**, 230 (2017).
